- pressure during spinal anaesthesia for caesarean section. *Br J Anaesth* 2004; 92:469–74
33. Lee SW, Khaw KS, Ngan Kee WD, Leung TY, Critchley LA: Haemodynamic effects from aortocaval compression at different angles of lateral tilt in non-labouring term pregnant women. *Br J Anaesth* 2012; 109:950–6
  34. Kinsella SM, Harvey NL: A comparison of the pelvic angle applied using lateral table tilt or a pelvic wedge at elective caesarean section. *Anaesthesia* 2012; 67:1327–31
  35. Harvey NL, Hodgson RL, Kinsella SM: Does body mass index influence the degree of pelvic tilt produced by a Crawford wedge? *Int J Obstet Anesth* 2013; 22:129–32
  36. Lees MM, Scott DB, Kerr MG, Taylor SH: The circulatory effects of recumbent postural change in late pregnancy. *Clin Sci* 1967; 32:453–65
  37. Westgate J, Garibaldi JM, Greene KR: Umbilical cord blood gas analysis at delivery: A time for quality data. *Br J Obstet Gynaecol* 1994; 101:1054–63

## ANESTHESIOLOGY REFLECTIONS FROM THE WOOD LIBRARY-MUSEUM

### Hill of “Cocoene,” “Cocoaine,” or Cocaine: Anesthetic Friend or Fiend?

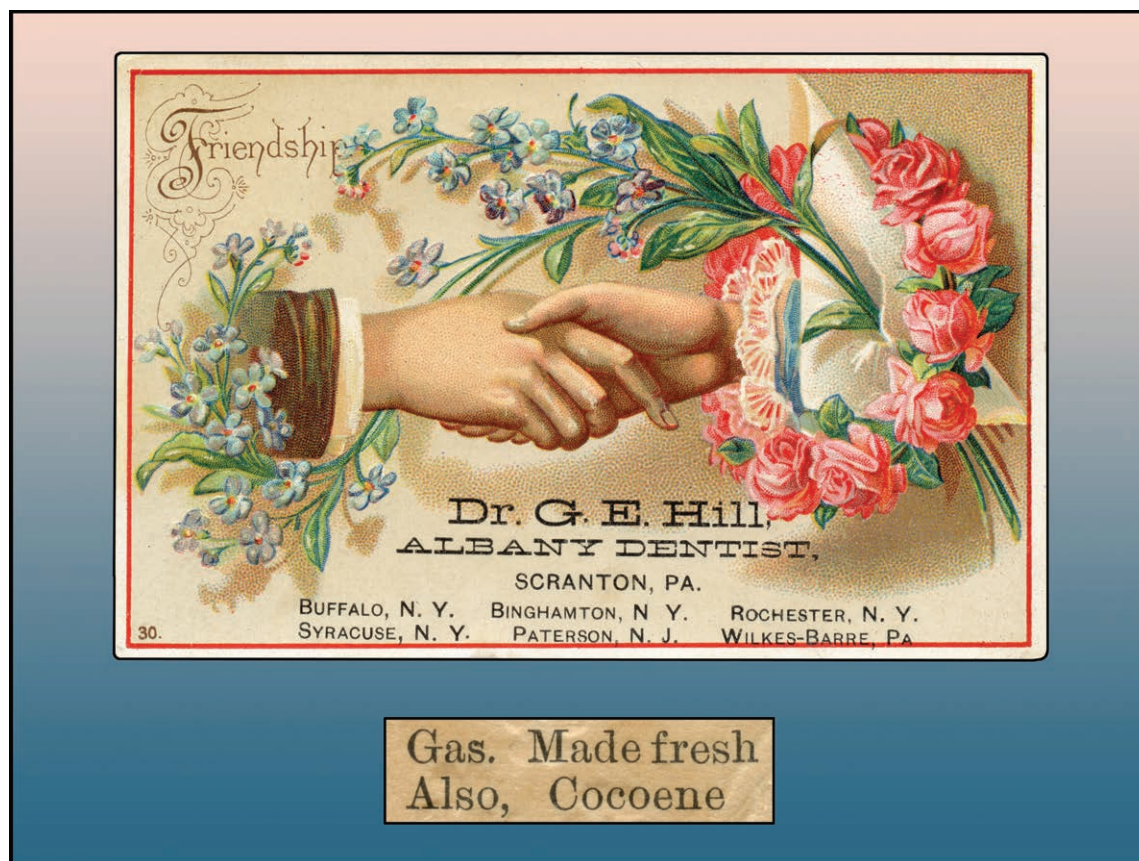

Besides printing a crooked obverse (*top*) on his ca. 1888 “Friendship” trade card, Dr. George E. Hill (ca. 1847 to 1923) misspelled his local anesthetic on the reverse as “Cocoene” (*bottom*). In Pennsylvania periodicals, his spelling misadventures advertised his numbing medication as “Cocoaine.” In August of 1905, *The Scranton Truth* juxtaposed stories of success and failure with cocaine. The success focused on one of Hill’s patients who was still using her same prosthetic teeth 14 yr after her anesthetic; the failure, titled “Cocaine Fiend Arrested,” followed a cocaine addict’s relapse. Is it any wonder then that a wary American public was questioning whether cocaine was a friend or a fiend? (Copyright © the American Society of Anesthesiologists’ Wood Library-Museum of Anesthesiology.)

George S. Bause, M.D., M.P.H., Honorary Curator and Laureate of the History of Anesthesia, Wood Library-Museum of Anesthesiology, Schaumburg, Illinois, and Clinical Associate Professor, Case Western Reserve University, Cleveland, Ohio. UJYC@aol.com.
